# Supplementary material for: Influence of Varied Fluorine Contents on Long-Term Storage Stability of Polyacrylate Nanoparticles and Film Properties
Source: Hindawi journal article supplement (doi:10.1155/2019/2970819), 2019-10-31
Supplement: f1 [file 2970819.f1.docx]

**Influence of varied fluorine contents on long-term storage stability of polyacrylate nanoparticles and film properties**

Hongzhu Liu1,†, Gaofan Zhang2,†, Lulu Lu3, Yuexing Chen4, Mengting Luo4, Jiming Bian5, Zefeng Wang4,6,*, Lijin Wang4,*

*1School of textile and material engineering,* *Dalian Polytechnic University, Dalian 116034, China*

*2Wenzhou Institute, University of Chinese Academy of Sciences (Wenzhou Institute of Biomaterials & Engineering), Wenzhou, 325001, China*

*3School of Biological Science and Engineering,* *South China University of Technology, Guangzhou 510640, China.*

*4Department of Chemistry, Lishui University, Lishui 323000, China*

*5Key Laboratory of Materials Modification by Laser, Ion and Electron Beams (Ministry of Education), School of Physics, Dalian. University of Technology, Dalian 116024, China*

*6Post-Doctoral Research Station, Dalian Zhenbang Fluorocarbon Paint Stock Co., Ltd., Dalian 116036, China*

*†These two authors contributed equally to this work*

**Correspondence should be addressed to Zefeng Wang (E-mail: shangk72@163.com) and Lijin Wang (E-mail:* [*lsxywlj@126.com*](mailto:lsxywlj@126.com)*)*


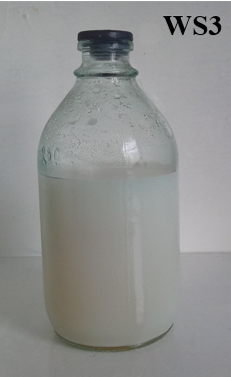


FIGURE S1: Visual observation for WS3 after 1 year.


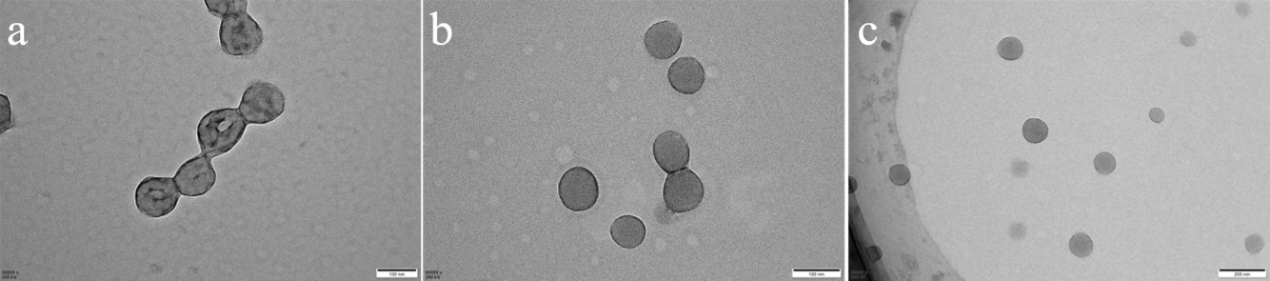


FIGURE S2: TEM images of different polyacrylate nanoparticles from (a) WS1, (b) WS2 and (c) WS3.


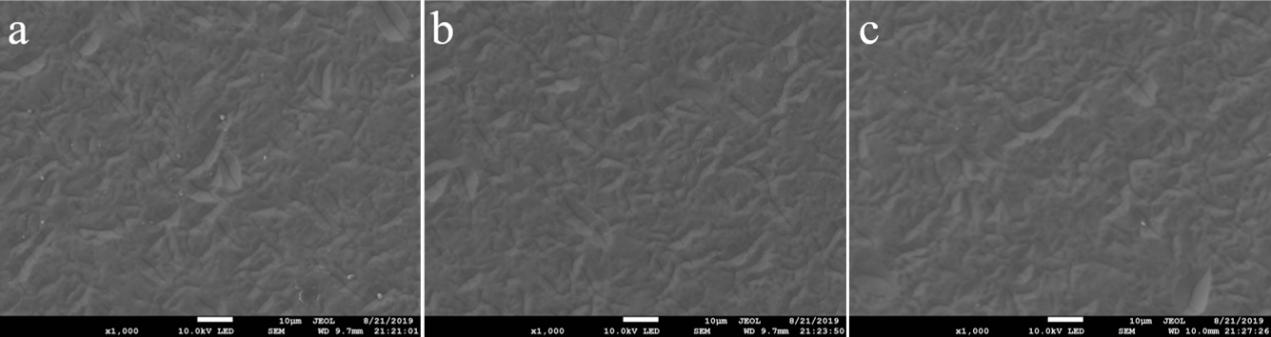


FIGURE S3: SEM images of different polyacrylate latex films from (a) WS1, (b) WS2 and (c) WS3.
